# Supplementary material for: Indocyanine Green-Labeled Platelets for Survival and Recovery Studies
Source: PubMed Central journal article supplement — Transfus Med Hemother. 2023 Oct 16;51(2):66–75. doi: 10.1159/000533623 (PMC10996059; doi:10.1159/000533623), 2023-10-16
Supplement: Supplementary_material-Suppl.1-s1.pdf [file Supplementary_material-Suppl.1-s1.pdf]

Supplementary Figure

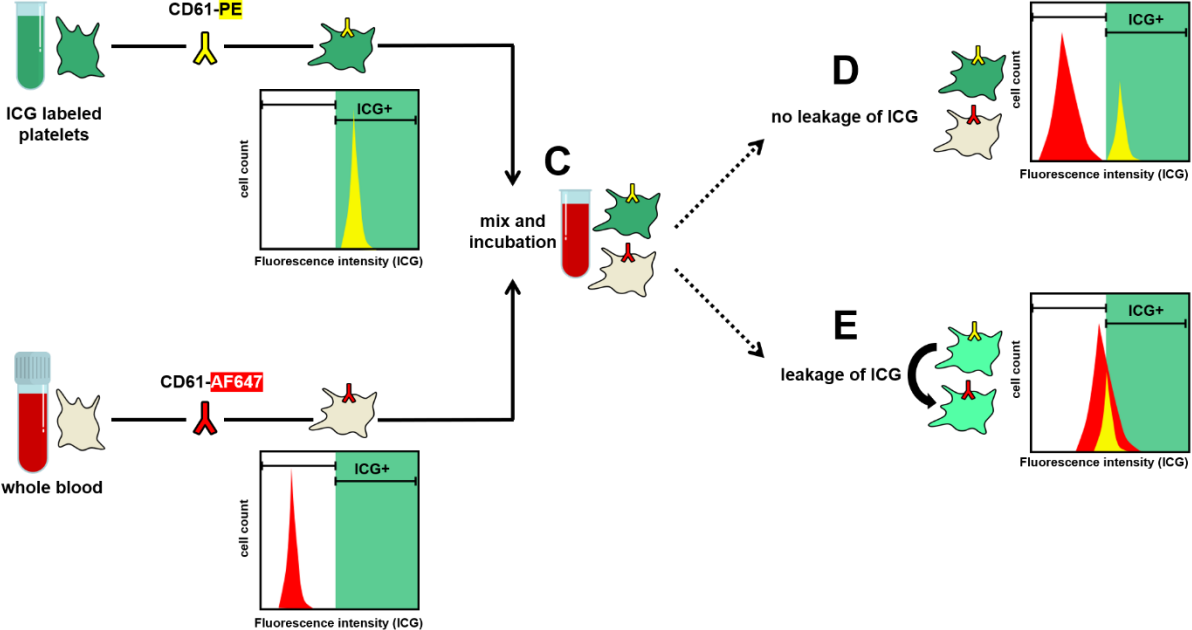

**Figure S1. Flow cytometric analysis after addition of whole blood to ICG-labeled platelets (10 μM ICG final concentration in 100% PAS-E).** In 100% PAS-E leakage of ICG from labeled platelets was not observed resulting in sufficient differentiation between labeled platelets from platelet concentrates and non-labeled platelets from whole blood. Labeling platelets in plasma containing additive solution leakage generated insufficient labeling with subsequent leakage of ICG from labeled platelets.
